# Supplementary material for: Ionic liquid functionalized metal–organic framework nanowires for sensitive and real-time electrochemical monitoring of nitric oxide released from living cells
Source: Royal Society of Chemistry journal article supplement (doi:10.1039/d2ay02059a), 2023-01-01
Supplement: d2ay02059a1.pdf [file d2ay02059a1.pdf]

## Supporting Information

### **Ionic liquid functionalized metal-organic framework nanowires for sensitive and real-time electrochemical monitoring nitric oxide released from living cells**

Lijun Tang,<sup>†</sup> Xinyu Sun,<sup>†</sup> Xianping Gao, Linyu Wang, Pei Yang, and Pinghua Ling\*

*Laboratory of Functionalized Molecular Solids, Ministry of Education, Anhui Key  
Laboratory of Chemo/Biosensing, College of Chemistry and Materials Science, Anhui  
Normal University, Wuhu 241002, P. R. China.*

\* To whom correspondence should be addressed. E-mail: phling@ahnu.edu.cn (P. Ling)

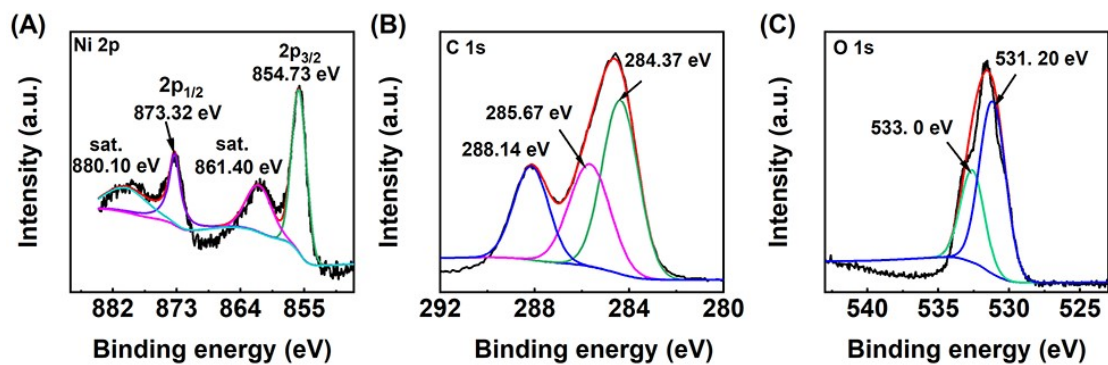

**Fig. S1.** XPS spectra of MOFNWs: (A) Ni 2p, (B) C 1s, and (C) O 1s.

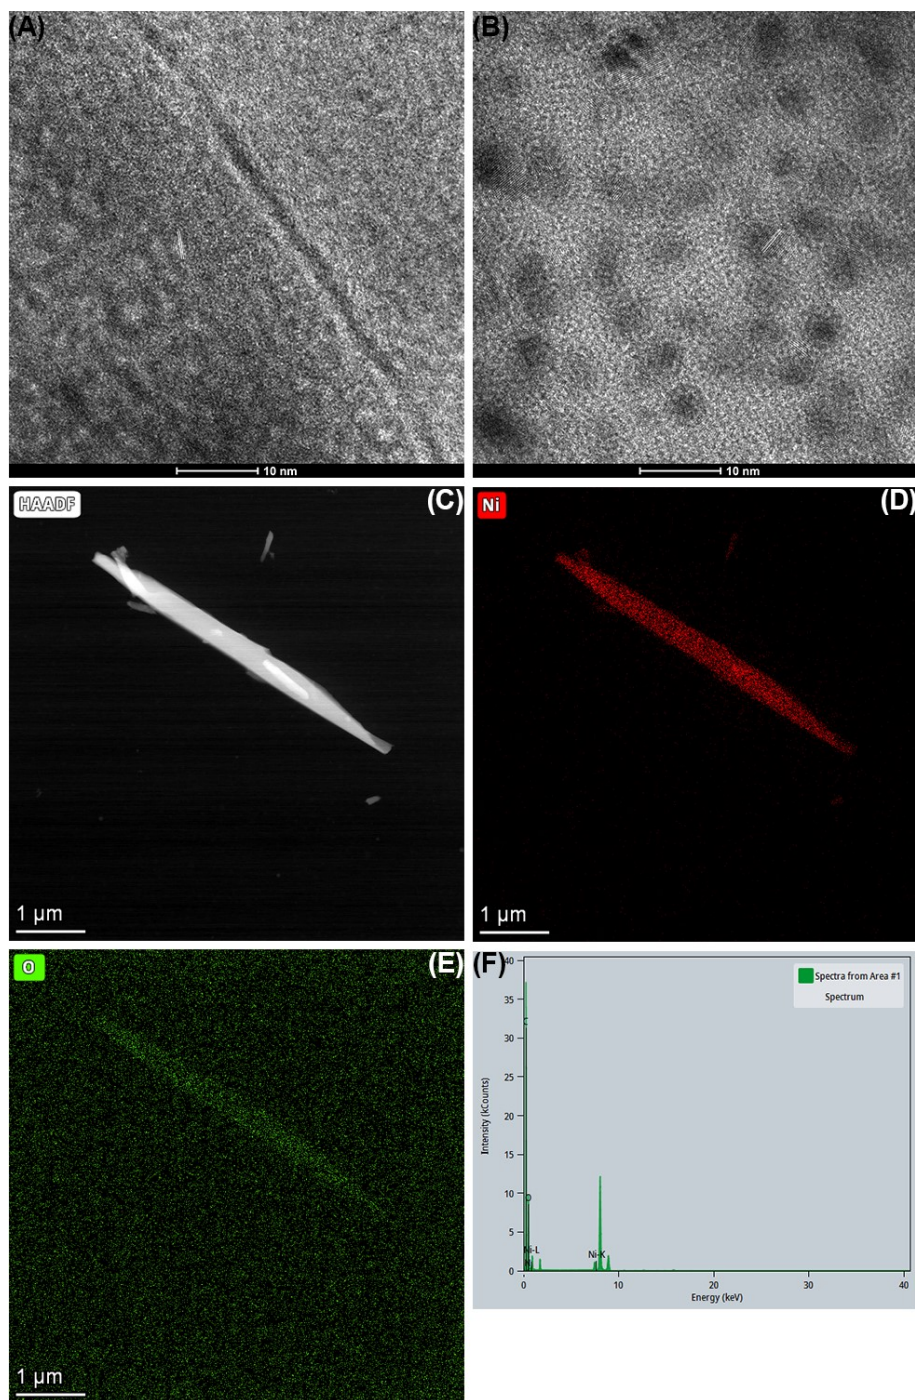

**Fig. S2.** HRTEM images of (A) MOFNWs and (B) IL@Au@MOFNWs/ITO, (C-E) STEM images and the corresponding elemental mapping of MOFNWs, and (F) TEM-EDS of MOFNWs.

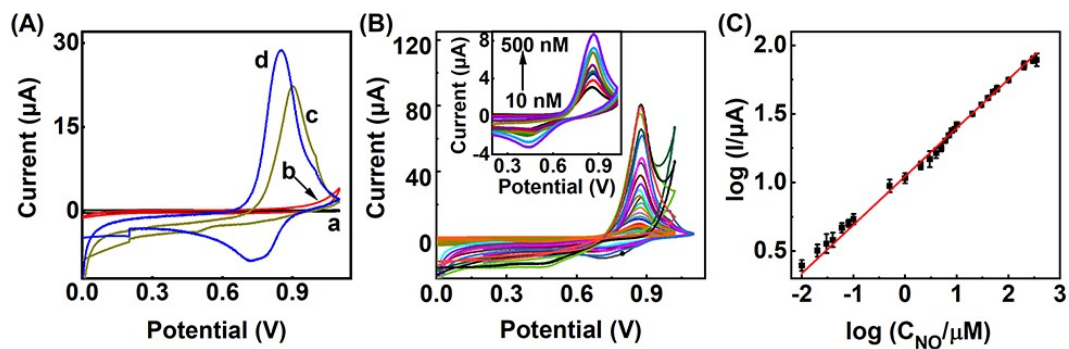

**Fig. S3.** (A) CVs of bare ITO (a), MOFNWs/ITO (b), Au@MOFNWs/ITO (c) and IL@Au@MOFNWs/ITO (d) in 0.1 M pH 7.4 PBS containing 10  $\mu\text{M}$  NO. (B) CV responses of the biosensor to different concentrations of NO at 10 nM, 20 nM, 30 nM, 40 nM, 60 nM, 80 nM, 100 nM, 500 nM, 1.0  $\mu\text{M}$ , 2.0  $\mu\text{M}$ , 3.0  $\mu\text{M}$ , 4.0  $\mu\text{M}$ , 5.0  $\mu\text{M}$ , 6.0  $\mu\text{M}$ , 7.0  $\mu\text{M}$ , 8.0  $\mu\text{M}$ , 9.0  $\mu\text{M}$ , 10  $\mu\text{M}$ , 20  $\mu\text{M}$ , 30  $\mu\text{M}$ , 40  $\mu\text{M}$ , 50  $\mu\text{M}$ , 60  $\mu\text{M}$ , 100  $\mu\text{M}$ , 200  $\mu\text{M}$ , 300  $\mu\text{M}$  and 350  $\mu\text{M}$  (from top to bottom). (C) Calibration curve of current intensity vs. NO concentration.

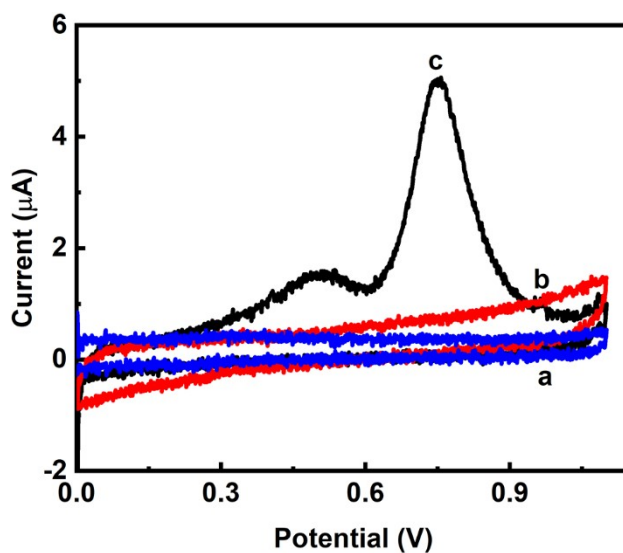

**Fig. S4.** CV response of IL/ITO (a), AuNPs/ITO (b) and IL@Au/ITO (c) with 30  $\mu\text{M}$  NO in 0.1 M PBS.

**Table S1.** Comparison of the performance of this sensor with other reported for the determination of NO.

| Modified electrodes               | Linear range             | LOD                | Reference |
|-----------------------------------|--------------------------|--------------------|-----------|
| N-G/FePc/Nafion/PLL ITO electrode | 0.18–400 $\mu\text{M}$   | 0.18 $\mu\text{M}$ | 1         |
| poly(TTBA-rGO)/ZnO/GCE            | 0.019–76 $\mu\text{M}$   | 7.7 nM             | 2         |
| CNF/hemin/Nafion electrode        | 0.02–1 $\mu\text{M}$     | 10 nM              | 3         |
| CA/CS/GNP 1.54T-CUA electrode     | 5–100 $\mu\text{M}$      | 0.2 $\mu\text{M}$  | 4         |
| Nafion/Pt/BDD                     | 0–10 $\mu\text{M}$       | 0.5 $\mu\text{M}$  | 5         |
| laminin/AuNPs-ctDNANGS/SPCE       | 2–500 nM                 | 0.8 nM             | 6         |
| 3D hemin/CFN                      | 0.024–70.9 $\mu\text{M}$ | 8.0 nM             | 7         |

**Table S2.** The reproducibility of the sensor for cell culture experiments

| Parallel test | Current ( $\mu\text{A}$ ) |              |
|---------------|---------------------------|--------------|
|               | L-Arg 2.0 mM              | L-Arg 8.0 mM |
| 1             | 7.25                      | 21.44        |
| 2             | 7.54                      | 22.04        |
| 3             | 7.83                      | 20.85        |
| 4             | 7.91                      | 22.76        |
| 5             | 8.06                      | 22.40        |
| 6             | 7.91                      | 22.70        |
| Average       | 7.75                      | 21.70        |
| RSD           | 3.85                      | 3.73         |

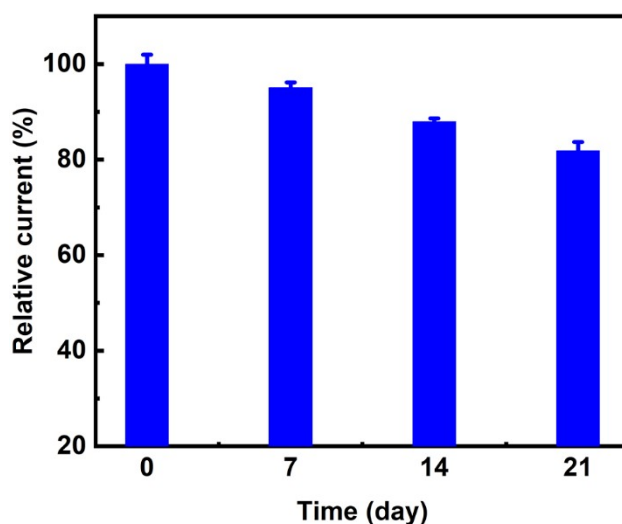

**Fig. S5.** Stability test for the IL@Au@MOFNWs/ITO electrode over 21 days.

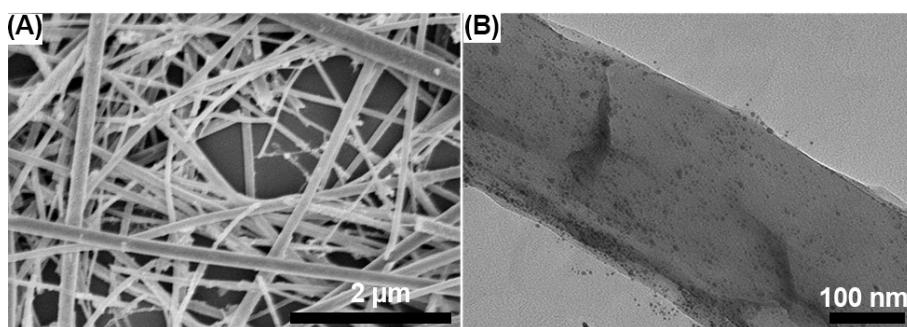

**Fig. S6.** (A) SEM and (B) TEM images of IL@Au@MOFNWs/ITO after electrochemical testing.

### **Supporting Reference**

- [1] H. Xu, C. Liao, Y. Liu, B. Ye, B. Liu, *Anal. Chem.* 90 (2018) 4438–4444.
- [2] M. Kim, M. Naveen, N. Gurudatt, Y. Shim, *Small* 13 (2017) 1700502.
- [3] L. Liu, L. Zhang, Z. Dai, Y. Tian, *Analyst* 142 (2017) 1452–1458.
- [4] J. Elliott, J. Duay, O. Simoska, J. Shear, K. Stevenson, *Anal. Chem.* 89 (2017) 1267–1274.
- [5] S. Henderson, K. Bhardwaj, V. Perugachi, P. Espinoza-Montero, J. J. Galligan, G.

M. Swain, *Anal. Chem.* DOI: 10.1021/acs.analchem.2c03731.

[6] B. Dou, J. Li, B. Jiang, R. Yuan, Y. Xiang, *Anal. Chem.* 91 (2019) 2273–2278.

[7] F.X. Hu, X.L. Xie, D.P. Wang, H.B. Yang, Y. Gu, B. Chen, C.M. Zhang, Q.H. Rao, Q.F. Li, C.X. Guo, *Sens. Actuators, B* 334 (2021) 129594.
